# Supplementary material for: Transport and return of an oilfield scale inhibitor reverse micelle nanofluid: impact of preflush and overflush
Source: Royal Society of Chemistry journal article supplement (doi:10.1039/c6ra07445f), 2016-01-01
Supplement: c6ra07445f1.pdf [file c6ra07445f1.pdf]

**Electronic Supporting Information (ESI) for:**  
**Transport and return of oilfield scale inhibitor reverse micelle nanofluid:**  
**Impact of preflush and overflow**

Ping Zhang <sup>a\*</sup>, Gedeng Ruan <sup>a</sup>, Dong Shen <sup>a, c</sup>, Amy T. Kan <sup>a, b</sup> and Mason B. Tomson <sup>a, b\*</sup>

<sup>a</sup>Department of Civil and Environmental Engineering,  
Rice University, Houston, Texas

<sup>b</sup>Nanosystems Engineering Research Center for Nanotechnology-Enabled Water Treatment,  
Rice University, Houston, Texas

<sup>c</sup>Presently with Baker Hughes, Inc.

ESI prepared for *RSC Advances*

\* To whom correspondence should be addressed: [ping.zhang@alumni.rice.edu](mailto:ping.zhang@alumni.rice.edu) and  
[mtomson@rice.edu](mailto:mtomson@rice.edu)

## **1. Synthesis of Calcium-DTPMP reverse micelle nanofluid:**

The below paragraph on nanofluid synthesis was adopted from Ref. #1 Experimental Section:

In a typical synthesis reaction, approximately 10 g of AOT solution and 4 g of C12EO9 solution were added into 100 mL isooctane solution in a 150 mL glass beaker, followed by constant stirring for 15 min to prepare the surfactant mixture solution. Then, in a 100 mL glass baker 5 mL of an aqueous solution containing 0.16 M  $\text{CaCl}_2$  and 0.02 M MES was added dropwise to 50 mL of the prepared surfactant mixture solution, while constantly stirred at room temperature (21°C). A clear translucent solution containing  $\text{CaCl}_2$  RM can be obtained. Similarly, in another 100 mL glass beaker 5 mL of an aqueous solution of 0.04 M DTPMP with sodium chloride (pH=9.0, neutralized by 2.0 M NaOH) was added dropwise to 50 mL of the prepared surfactant mixture solution, while constantly stirred at room temperature. A clear translucent solution containing Na-DTPMP RM was obtained. Ca-DTPMP RMNF was prepared by mixing the previously obtained  $\text{CaCl}_2$  RM solution with Na-DTPMP RM solution in a 200 mL glass beaker with stirring at room temperature and a translucent solution was obtained. Upon completion of the solution mixing, the resultant Ca-DTPMP RMNF was filtered through a 1  $\mu\text{m}$  filter (Merck Millipore Corp.) to remove any undissolved particles. The resultant solution is Ca-DTPMP RMNF with a pH value of ca. 5.8. The nanofluid was centrifuged at 6,500 rpm for 10 min and little deposit was found at the bottom of the solution.

## **2. DTPMP analysis methods:**

DTPMP concentrations (above 3  $\text{mg L}^{-1}$ ) were analyzed by inductively coupled plasma-optical emission spectrometer (ICP-OES) (Optima 4300 Dv, Perkin Elmer). The wavelength for phosphorus measurement was 213.617 nm. A solution containing 5  $\text{mg L}^{-1}$  yttrium (371.029 nm) was utilized as an internal standard solution. Each sample measurement was repeated for five times and the mean value of these measurements was reported. The standard deviation for every sample measurement was less than 0.5 %. Measurement of low concentrations of DTPMP was realized by digesting DTPMP to form phosphate and

then producing the phosphomolybdenum blue complex and measuring spectrophotometrically at 890 nm.<sup>2</sup> Spectrophotometric method is able to measure phosphonate from as low as 0.1 to 2.5 mg L<sup>-1</sup> as phosphate, which corresponds to 0.12 to 3 mg L<sup>-1</sup> as DTPMP.

### 3. Understanding the RMNF transport via advection and diffusion mechanism:

#### 3.1 Theory

From the standpoint of advection and diffusion, the transport of inhibitor nanofluid can be mathematically described by one dimensional advection dispersive equation:<sup>3-5</sup>

$$R \frac{\partial C}{\partial t} - D \frac{\partial^2 C}{\partial x^2} + v \frac{\partial C}{\partial x} + J_d C = 0 \quad (\text{Eq. ESI-1})$$

C (mg L<sup>-1</sup>) is the effluent RMNF concentration at a given time; t (min) is the time; D (cm<sup>2</sup> min<sup>-1</sup>) is the hydrodynamic dispersion coefficient; x (cm) accounts for the distance of RMNF transport inside the column; and v (cm min<sup>-1</sup>) is the linear pore velocity calculated as  $v=Q/\pi r^2 \varepsilon$ , where Q is the flow rate (mL min<sup>-1</sup>);  $\varepsilon$  is the sandstone medium porosity, and r (cm) is the cross sectional radius of the column. Linear pore velocity is the average travel velocity for RMNF particles. The first term of Eq. ESI-1 is the RM concentration change at a given time; the second term is the change in concentration due to diffusion/dispersion; the third term represents RM concentration change associated with advection and the last term is the RM mass removal modeled as a first order deposition process.<sup>3-5</sup> The mathematical solution to Eq. ESI-1 can be expressed as:<sup>3-5</sup>

$$C(x, t) = \frac{1}{2} \exp\left[\frac{(v-w)x}{2D}\right] \operatorname{erfc}\left[\frac{Rx-wt}{2(DRt)^{0.5}}\right] + \frac{1}{2} \exp\left[\frac{(v+w)x}{D}\right] \operatorname{erfc}\left[\frac{Rx+wt}{2(DRt)^{0.5}}\right] \quad (\text{Eq. ESI-2})$$

and  $w = (v^2 + 4J_d D)^{0.5}$

Thus, based on Eq. ESI-2, the breakthrough level ( $C/C_0$ ) of the RM particles from the column transport experiment can be mathematically calculated and compared with the experimentally obtained breakthrough level. The values of R and  $J_d$  in each transport study were acquired by minimizing the differences between the calculated effluent concentrations based on Eq. ESI-2 and the experimentally

observed effluent concentrations via the least square method. Excel Solver function was used to find the R and  $J_d$  values.

### 3.2 Characterization of calcite formation medium via tracer test

A tracer (tritiated water) test was carried out to measure the PV and the hydrodynamic dispersion coefficient (D) of the packed column. According to the breakthrough curves of the tracer in each medium, the D values for each medium can be obtained by fitting the one-dimensional advection-dispersion equation (Eq. 1) to the acquired data using CXTFIT code,<sup>6</sup> by setting R to one and  $J_d$  to zero:

$$\frac{\partial C}{\partial t} = D \frac{\partial^2 C}{\partial x^2} - v \frac{\partial C}{\partial x} \quad (\text{Eq. ESI-3})$$

where C ( $\text{mg L}^{-1}$ ) is the effluent tracer concentration at a certain time; t (min) denotes the time. The tracer test was conducted at a flow rate of  $60 \text{ mL hr}^{-1}$ , corresponding to a pore velocity of  $2.85 \text{ cm min}^{-1}$  and the measured D value is  $0.065 \text{ cm}^2 \text{ min}^{-1}$ . D value ( $\text{cm}^2 \text{ min}^{-1}$ ) can be calculated as:

$$D = \alpha_d \times v \quad (\text{Eq. ESI-4})$$

where  $\alpha_d$  (cm) is the dispersivity and v ( $\text{cm min}^{-1}$ ) is the linear pore velocity introduced above. Based on Eq. ESI-4,  $\alpha_d$  for calcite medium at  $2.85 \text{ cm min}^{-1}$  pore velocity is calculated to be  $0.0228 \text{ cm}$ .  $\alpha_d$  is a characteristic property of a formation media<sup>3</sup>. Thus, the dispersivity of calcite should be maintained the same for different pore velocities. The D values for other flow velocities can be easily calculated as the product of the dispersivity with the pore velocity, as shown in Table 1 of the main article.

### 4. Understanding the RMNF transport via filtration and attachment mechanism:

The transport of RMNF particles is a course of the particles being continuously removed by sandstone medium via collection and attachment of RMNF particles to sandstone surfaces. The deposition of RMNF particles to sandstone medium surface includes two consecutive steps: collection of RMNF particles by medium surfaces (particle collection) and subsequent attachment of the RMNF particles to medium

surface (particle attachment).<sup>4</sup> Therefore, a collection efficiency ( $\eta_0$ ) and an attachment efficiency ( $\alpha$ ) were introduced to describe the particle collection and attachment processes, respectively. The collection efficiency ( $\eta_0$ ) considers the particle collection due to Brownian diffusion, interception and sedimentation. Thus, the  $\eta_0$  term can be expressed as the sum of these three mechanisms:<sup>3-5</sup>

$$\eta_0 = \eta_D + \eta_I + \eta_G \quad (\text{Eq. ESI-5})$$

where  $\eta_D$ ,  $\eta_I$  and  $\eta_G$  are the single collector efficiency components due to Brownian diffusion, interception and sedimentation, respectively. Typically, the Brownian diffusion will be dictating the collection of submicron sized particles to the medium surface within the particle size range of 1  $\mu\text{m}$ .<sup>4,5</sup>

These three components can be calculated as a function of several dimensionless groups as follows:<sup>4,5,7</sup>

$$\eta_D = 2.4A_s^{1/3}N_R^{-0.081}N_{pe}^{-0.715}N_{vdW}^{-0.052} \quad (\text{Eq. ESI-6})$$

where  $A_s$  is the porosity-dependent parameter of Happel's model,  $N_R$  is the aspect ratio,  $N_{pe}$  is the Peclet number, and  $N_{vdW}$  is the van der Waals number.  $A_s$  is the porosity-dependent parameter of Happel's model and is defined as

$$A_s = \frac{2(1-\gamma^5)}{2-\gamma+3\gamma^5-2\gamma^6} \quad (\text{Eq. ESI-7})$$

where  $\gamma = (1-\epsilon)^{1/3}$ ,  $\epsilon$  is the porosity of the porous medium.  $N_R$  is the ratio of particle diameter ( $d_p$ ) to spherical collector diameter ( $d_c$ ) (i.e.  $N_R = \frac{d_p}{d_c}$ ).

$$N_{pe} = \frac{vd_c}{D_\infty} \quad (\text{Eq. Eq. ESI-8})$$

where  $v$  ( $\text{m s}^{-1}$ ) is the pore velocity,  $D_\infty$  ( $\text{m}^2 \text{s}^{-1}$ ) is the diffusion coefficient in an infinite medium, which, according to Stocks-Einstein relation, is defined as

$$D_{\infty} = \frac{kT}{3\pi\mu d_p} \quad (\text{Eq. ESI-9})$$

where  $k$  is the Boltzmann constant ( $1.38 \times 10^{-23} \text{ J K}^{-1}$ );  $T$  (K) is the absolute temperature;  $\mu$  ( $\text{kg m}^{-1} \text{ s}^{-1}$ ) is the absolute viscosity of the fluid (water). The van der Waals number  $N_{\text{vdW}}$  is defined as

$$N_{\text{vdW}} = \frac{A}{kT} \quad (\text{Eq. ESI-10})$$

where  $A$  is the Hamaker constant (assumed to be  $10^{-20} \text{ J}$ ). Moreover,

$$\eta_I = 0.55A_s N_R^{1.55} N_{pe}^{-0.125} N_{\text{vdW}}^{0.125} \quad (\text{Eq. ESI-11})$$

$$\eta_G = 0.475N_R^{-1.35} N_{pe}^{-1.11} N_{\text{vdW}}^{0.053} N_{gr}^{1.11} \quad (\text{Eq. ESI-12})$$

where  $N_{gr}$  is the gravitational force number, defined as

$$N_{gr} = \frac{d_p^4(\rho_p - \rho_f)g}{3kT} \quad (\text{Eq. ESI-13})$$

where  $\rho_p$  is the density of the nanoparticles;  $\rho_f$  is the density of fluid and  $g$  is the gravitational acceleration,  $9.81 \text{ m s}^{-2}$ .

## 5. Calculation of negative logarithm of ion activity product:

As discussed previously,<sup>8, 9</sup> phosphonate inhibitors are retained in calcite-bearing formation by forming metal-phosphonate salts. Thus, the release of phosphonate from Ca-phosphonate solid complexes during inhibitor return is proposed to be controlled by the dissolution of Ca-phosphonate precipitates into the production brine. Therefore, the course of Ca-DTPMP RM return of DTPMP can be viewed as a continuous dissolution of Ca-DTPMP solid complex into the synthetic brine. In light of a proposed solution-speciation model,<sup>10</sup> the DTPMP return profiles can be delineated by calculating the negative logarithm of ion activity product (pIP) of the Ca-DTPMP complex. pIP can be calculated as:

$$pIAP = -\log_{10}[(Ca^{2+})^3 \{H^+\}^4 (DTPMP^{10-})] \quad (\text{Eq. ESI-14})$$

where parentheses accounts for molar concentration and braces for activity. The free calcium ion ( $Ca^{2+}$ ) and  $DTPMP^{10-}$  species concentrations were calculated from the total DTPMP concentrations in aqueous phase via a speciation model.<sup>10</sup>

## 6. Calculation of NSL and Protection volume

Normalized squeeze lifetime (NSL) is the ratio of inhibitor return volumes and the mass of inhibitors (DTPMP) injected.<sup>11</sup> NSL evaluates the volume of produced water protected for each kilogram of inhibitor added. Thus, NSL ( $\text{bbl. kg}^{-1}$ ) can be calculated as:

$$NSL = \frac{\text{Return volume (liter)} \times 10^6 (\text{mg kg}^{-1})}{\text{Inhibitor mass (mg)} \times 159 (\text{liter bbl.}^{-1})} \quad (\text{Eq. ESI-15})$$

Protection volume is the estimated volume of production brine protected by injecting RMNF containing 1000 kg of DTPMP in a single squeeze treatment. Basically, protection volume (in the unit of bbl.) can be calculated as

$$\text{Protection volume} = NSL (\text{bbl. kg}^{-1}) \times 1000 \text{ kg} \quad (\text{Eq. ESI-16})$$

## References:

1. P. Zhang, D. Shen, A.T. Kan and M.B. Tomson, Synthesis and laboratory testing of novel calcium-phosphonate reverse micelle nanofluid for oilfield mineral scale control, *RSC Adv.*, 2016, 6, 39883-39895.
2. A.T. Kan, J.E. Oddo and M.B. Tomson, Formation of Two Calcium Diethylenetriaminepentakis (methylene phosphonic acid) Precipitates and Their Physical Chemical Properties, *Langmuir*, 1994, 10, 1450.
3. R. J. Charbeneau, *Groundwater Hydraulics And Pollutant Transport*, 1st ed., Waveland Press, Long Grove, IL, 2006.
4. M.M. Clark, *Transport Modeling for Environmental Engineers and Scientists*, 2nd ed., John Wiley & Sons, Hoboken, NJ, 2009.
5. J.N. Ryan and M. Elimelech, Colloid mobilization and transport in groundwater. *Colloids and Surfaces A*, 1996, 107, 1-56.
6. J. C. Parker and M. T. van Genuchten, *Determining Transport Parameters from Laboratory and Field Tracer Experiments*. Blacksburg, VA, 1984; Vol. Bulletin 84-3.
7. N. Tufenkji and M. Elimelech, Correlation Equation for Predicting Single-Collector Efficiency in Physicochemical Filtration in Saturated Porous Media. *Environmental Science & Technology* 2004, 38, 529-536.
8. M.B. Tomson, A.T. Kan and G. Fu, Control of Inhibitor Squeeze via Mechanistic Understanding of Inhibitor Chemistry, *SPE J.*, 2006, 11, 283-293.
9. A.T. Kan, G. Fu and M.B. Tomson, Prediction of Scale Inhibitor Squeeze and Return in Calcite-Bearing Formation, SPE 93265, In *SPE International Symposium on Oilfield Chemistry*, The Woodlands, Texas, 2005.
10. M.B. Tomson, A.T. Kan and J.E. Oddo, Acid/Base and Metal Complex Solution Chemistry of the Polyphosphonate DTPMP versus Temperature and Ionic Strength, *Langmuir*, 1994, 10, 1442-1449.
11. A. T. Kan, G. Fu, D. Shen, H. Al-Saiari and M. B. Tomson, Enhanced Scale-Inhibitor Treatments With the Addition of Zinc, *SPE J.*, 2009, 14, 617-626.
